# Supplementary material for: Thyroid hormone treatment among pregnant women with subclinical hypothyroidism: US national assessment
Source: PubMed Central journal article supplement — BMJ. 2017 Jan 25;356:i6865. doi: 10.1136/bmj.i6865 (PMC5266622; doi:10.1136/bmj.i6865), 2017-01-25
Supplement: mars034233.ww1_default.pdf [file mars034233.ww1_default.pdf]

**Supplementary Table A: ICD-9-CM and CPT codes used to identify pregnant women**

| <b>Description of Pregnancy Claim:</b>                     | <b>ICD-9-CM/CPT Codes Used</b> |
|------------------------------------------------------------|--------------------------------|
| Normal Pregnancy                                           | V22.x                          |
| High-Risk Pregnancy                                        | V23.xx                         |
| Obstetric Panel                                            | 80055                          |
| Maternal Serum Screen Test                                 | 84163                          |
| Maternal Serum Screen Test                                 | 81511                          |
| Missed Abortion                                            | 632                            |
| Spontaneous abortion                                       | 634.xx                         |
| Unspecified abortion                                       | 637.xx                         |
| Suspected fetal and placental problems; intrauterine death | 656.4                          |

**Supplementary Table B: ICD-9-CM codes used for exclusions**

| <b>Codes indicating Multiple Gestation</b>                              | <b>ICD-9-CM Excluded</b> |
|-------------------------------------------------------------------------|--------------------------|
| Twin Birth All Live born                                                | V31.xx                   |
| Twin Birth All Stillborn                                                | V32.xx                   |
| Twin Birth Unspecified Live born or Stillborn                           | V33.xx                   |
| Other Multiple Birth (Three or More) All Live born                      | V34.xx                   |
| Other Multiple Birth (Three or More) All Stillborn                      | V35.xx                   |
| Other Multiple Birth (Three or More) Live born and Stillborn            | V36.xx                   |
| Other Multiple Birth (Three or More) Unspecified Live born or Stillborn | V37.xx                   |
| Live born unspecified single, twin or multiple                          | V39.xx                   |
| Multiple Pregnancy                                                      | 651.xx                   |
| <b>Codes indicating Other</b>                                           |                          |
| Abnormal uterine contractions affecting fetus or newborn                | 763.7                    |
| Complications of labor and delivery affecting fetus or newborn          | 763.8x                   |

**Supplementary Table C: ICD-9-CM and CPT codes used to identify end of pregnancy**

| <b>Description of End of Pregnancy:</b>                            | <b>ICD-9-CM/CPT Codes Used</b> |
|--------------------------------------------------------------------|--------------------------------|
| Outcome of Delivery                                                | V27.0                          |
| Single live born                                                   | V30.xx                         |
| Normal Delivery                                                    | 650.xx                         |
| Delivery                                                           | 763.xx                         |
| Forceps or vacuum extractor delivery                               | 669.5x                         |
| Breech extraction                                                  | 669.6x                         |
| Malposition and malpresentation of fetus; breech presentation      | 652.2x                         |
| Forceps/vacuum/breech delivery                                     | 72.x                           |
| Assisted/Induced delivery                                          | 73.x                           |
| Vaginal delivery only, after previous cesarean delivery            | 59612                          |
| Vaginal delivery only, after previous cesarean delivery            | 59610                          |
| Vaginal delivery only, after previous cesarean delivery            | 59614                          |
| Routine obstetric care including antepartum care, vaginal delivery | 59400                          |
| Vaginal delivery only                                              | 59409                          |
| Vaginal delivery only                                              | 59410                          |
| Classical cesarean section                                         | 74.0                           |
| Low cervical cesarean section                                      | 74.1                           |
| Extra peritoneal cesarean section                                  | 74.2                           |
| Cesarean section of other specified type                           | 74.4                           |
| Cesarean section of unspecified type                               | 74.9                           |
| Other cesarean section of unspecified type                         | 74.99                          |
| obstetric care including antepartum care, cesarean delivery        | 59510                          |
| Cesarean delivery only;                                            | 59514                          |
| Cesarean delivery only; including postpartum care                  | 59515                          |
| Cesarean delivery                                                  | 59525                          |
| Cesarean delivery                                                  | 59618                          |
| Cesarean delivery                                                  | 59620                          |
| Cesarean delivery                                                  | 59622                          |
| Cesarean delivery, without mention of indication                   | 669.7x                         |
| Early onset of delivery                                            | 644.2x                         |
| Missed Abortion                                                    | 632                            |
| Spontaneous abortion                                               | 634.xx                         |
| Unspecified abortion                                               | 637.xx                         |
| Suspected fetal and placental problems; intrauterine death         | 656.4                          |
| Outcome of delivery, single stillborn                              | V27.1                          |
| Treatment of incomplete abortion                                   | 59812                          |
| Surgical treatment of missed abortion; first trimester             | 59820                          |
| Surgical treatment of missed abortion; second trimester            | 59821                          |
| Treatment of septic abortion, completed surgically                 | 59830                          |
| Induced abortion, by dilation and curettage                        | 59840                          |
| Induced abortion, by dilation and evacuation                       | 59841                          |
| Induced abortion                                                   | 59850                          |
| Induced abortion                                                   | 59851                          |
| Induced abortion                                                   | 59852                          |
| Induced abortion                                                   | 59855                          |
| Induced abortion                                                   | 59856                          |

**Supplemental Table C: ICD-9-CM and CPT codes used to indicate end of pregnancy (continued)**

|                            |        |
|----------------------------|--------|
| Induced abortion           | 59857  |
| Legally induced abortion   | 635.xx |
| Illegally induced abortion | 636.xx |
| Failed attempt abortion    | 638.xx |

**Supplementary Table D: ICD-9-CM codes used to identify baseline comorbidities**

| <b>Description of Baseline Comorbidities</b>                                                                                                                                                                                                       | <b>ICD-9-CM Used</b>                                   |
|----------------------------------------------------------------------------------------------------------------------------------------------------------------------------------------------------------------------------------------------------|--------------------------------------------------------|
| Obesity                                                                                                                                                                                                                                            | 278.0, 278.00, 278.01, 278.02, 278.03                  |
| History of thyroid disease (Nontoxic uninodular/multinodular goiter, Unspecified nontoxic nodular goiter, Goiter specified as simple, Goiter unspecified, Hashimoto's disease, Other and unspecified chronic thyroiditis, Thyroiditis unspecified) | 241.0, 241.1, 241.9, 240.0, 240.9, 245.2, 245.8, 245.9 |
| Diabetes Mellitus                                                                                                                                                                                                                                  | Charlson Index                                         |
| Hypertension                                                                                                                                                                                                                                       | 401.xx, 405.xx, 642.0x, 642.1x, 642.2x                 |
| History of recurrent pregnancy loss                                                                                                                                                                                                                | 629.81, 646.3                                          |

**Supplementary Table E: ICD-9-CM and CPT codes used to identify adverse outcomes**

| <b>Description of Adverse Outcomes</b> | <b>ICD-9-CM/CPT Codes Used</b>                         |
|----------------------------------------|--------------------------------------------------------|
| Pregnancy Loss                         | 632, 634.xx, 637.xx, 656.4, V27.1, 59812, 59820, 59821 |
| Preterm delivery                       | 644.2x                                                 |
| Preterm labor                          | 644.0x, 640.0x                                         |
| Premature rupture of membranes         | 658.1x                                                 |
| Placental abruption                    | 641.2x                                                 |
| Gestational diabetes                   | 648.8x                                                 |
| Gestational hypertension               | 642.3x                                                 |
| Preeclampsia                           | 642.4x, 642.5x                                         |
| Poor fetal growth                      | 656.5x                                                 |
| Tachycardia                            | 427.xx, 785.0, 785.1                                   |

**Supplementary Table F: Clinical Outcomes Associated with Levothyroxine Treatment (excluding other thyroid hormone preparations)**

| Adverse Outcomes <sup>1</sup>         | Event n (%)            |                        | Adjusted OR,<br>95% CI | P-Value <sup>4</sup> |
|---------------------------------------|------------------------|------------------------|------------------------|----------------------|
|                                       | Yes-Group A<br>(N=832) | No-Group B<br>(N=4562) |                        |                      |
| Pregnancy Loss <sup>2</sup>           | 85 (10.2%)             | 614 (13.5%)            | 0.59 (0.45, 0.78)      | <0.01                |
| Preterm delivery                      | 59 (7.1%)              | 236 (5.2%)             | 1.61 (1.15, 2.26)      | 0.01                 |
| Preterm labor                         | 110 (13.2%)            | 569 (12.5%)            | 1.14 (0.89, 1.46)      | 0.30                 |
| Premature rupture of membranes        | 40 (4.8%)              | 220 (4.8%)             | 0.97 (0.66, 1.42)      | 0.78                 |
| Placental abruption                   | 7 (0.8%)               | 36 (0.8%)              | 1.62 (0.66, 3.96)      | 0.29                 |
| Gestational diabetes                  | 100 (12.0%)            | 401 (8.8%)             | 1.39 (1.07, 1.82)      | 0.02                 |
| Gestational hypertension <sup>3</sup> | 50 (6.0%)              | 221 (4.8%)             | 1.29 (0.89, 1.85)      | 0.18                 |
| Preeclampsia <sup>3</sup>             | 46 (5.5%)              | 177 (3.9%)             | 1.64 (1.12, 2.41)      | 0.01                 |
| Poor fetal growth                     | 78 (9.4%)              | 397 (8.7%)             | 1.13 (0.85, 1.52)      | 0.40                 |
| Tachycardia                           | 17 (2.0%)              | 90 (2.0%)              | 1.69 (0.95, 3.02)      | 0.07                 |

<sup>1</sup>Adjusted for age and TSH as continuous variables, race, income, Charlson Index, hypertension, obesity and history of thyroid disease

<sup>2</sup>Adjusted for history of pregnancy loss in addition to other covariates

<sup>3</sup>Adjusted for age and TSH as continuous variables, race, income, Charlson Index, obesity and history of thyroid disease

<sup>4</sup>P-Value used is for adjusted outcomes

**Supplementary Table G: Clinical Outcomes Associated with Levothyroxine Treatment (excluding other thyroid hormone preparations), Stratified by TSH Level**

| Adverse Outcomes <sup>1</sup>         | TSH Level 2.5 - 4.0<br>(OR, 95% CI) <sup>4</sup> | TSH Level 4.1 - 10.0<br>(OR, 95% CI) <sup>4</sup> | P-Value for<br>Interaction |
|---------------------------------------|--------------------------------------------------|---------------------------------------------------|----------------------------|
| Pregnancy Loss <sup>2</sup>           | 0.87 (0.62, 1.22)                                | 0.43 (0.29, 0.63)                                 | <0.01                      |
| Preterm delivery                      | 1.94 (1.29, 2.92)                                | 1.35 (0.81, 2.27)                                 | 0.28                       |
| Preterm labor                         | 1.27 (0.92, 1.75)                                | 1.01 (0.71, 1.43)                                 | 0.33                       |
| Premature rupture of membranes        | 1.04 (0.61, 1.77)                                | 0.82 (0.49, 1.38)                                 | 0.52                       |
| Placental abruption                   | 1.43 (0.50, 4.12)                                | 2.18 (0.36, 13.17)                                | 0.69                       |
| Gestational diabetes                  | 1.42 (1.00, 2.02)                                | 1.47 (0.99, 2.17)                                 | 0.91                       |
| Gestational hypertension <sup>3</sup> | 1.79 (1.15, 2.79)                                | 0.92 (0.55, 1.54)                                 | 0.05                       |
| Preeclampsia <sup>3</sup>             | 1.79 (1.10, 2.89)                                | 1.64 (0.92, 2.93)                                 | 0.83                       |
| Poor fetal growth                     | 0.97 (0.64, 1.47)                                | 1.11 (0.75, 1.65)                                 | 0.65                       |
| Tachycardia                           | 1.63 (0.85, 3.12)                                | 1.27 (0.42, 3.81)                                 | 0.70                       |

<sup>1</sup>Adjusted for age, race, income, Charlson Index, hypertension, obesity and history of thyroid disease

<sup>2</sup>Adjusted for history of pregnancy loss in addition to other covariates

<sup>3</sup>Adjusted for age, race, income, Charlson Index, obesity and history of thyroid disease

<sup>4</sup>Untreated women is the referent group

**Supplementary Table H: Baseline Patient Characteristics Between Adherent and Non-adherent to Thyroid Hormone Treatment (based on proportion of days covered >80%)**

| Characteristics                            | Levothyroxine Adherence |               | Total<br>(N=843) | P-Value |
|--------------------------------------------|-------------------------|---------------|------------------|---------|
|                                            | Yes<br>(N=673)          | No<br>(N=170) |                  |         |
| <b>Age</b>                                 |                         |               |                  | <0.01   |
| Mean (SD)                                  | 32.0 (4.4)              | 30.6 (5.4)    | 31.7 (4.7)       |         |
| Median                                     | 32                      | 31            | 32               |         |
| Q1, Q3                                     | 29.0, 35.0              | 27.0, 34.0    | 29.0, 35.0       |         |
| <b>TSH Value</b>                           |                         |               |                  | 0.87    |
| Mean (SD)                                  | 4.8 (1.7)               | 4.8 (1.6)     | 4.8 (1.7)        |         |
| Median                                     | 4.6                     | 4.4           | 4.6              |         |
| Q1, Q3                                     | 3.4, 5.7                | 3.4, 5.5      | 3.4, 5.7         |         |
| <b>TSH Level Group</b>                     |                         |               |                  | 0.53    |
| 2.5 - 4.0                                  | 267 (39.7%)             | 63 (37.1%)    | 330 (39.1%)      |         |
| 4.1 - 10.0                                 | 406 (60.3%)             | 107 (62.9%)   | 513 (60.9%)      |         |
| <b>Age Group</b>                           |                         |               |                  | <0.01   |
| 18 - 24                                    | 24 (3.6%)               | 25 (14.7%)    | 49 (5.8%)        |         |
| 25 - 34                                    | 460 (68.4%)             | 111 (65.3%)   | 571 (67.7%)      |         |
| 35 - 44                                    | 188 (27.9%)             | 32 (18.8%)    | 220 (26.1%)      |         |
| 45 - 54                                    | 1 (0.1%)                | 2 (1.2%)      | 3 (0.4%)         |         |
| <b>Race</b>                                |                         |               |                  | 0.87    |
| White                                      | 370 (55.0%)             | 95 (55.9%)    | 465 (55.2%)      |         |
| Black                                      | 41 (6.1%)               | 8 (4.7%)      | 49 (5.8%)        |         |
| Hispanic                                   | 77 (11.4%)              | 23 (13.5%)    | 100 (11.9%)      |         |
| Asia                                       | 151 (22.4%)             | 37 (21.8%)    | 188 (22.3%)      |         |
| Unknown                                    | 34 (5.1%)               | 7 (4.1%)      | 41 (4.9%)        |         |
| <b>Charlson Index</b>                      |                         |               |                  | 0.27    |
| 0                                          | 596 (88.6%)             | 148 (87.1%)   | 744 (88.3%)      |         |
| 1                                          | 59 (8.8%)               | 20 (11.8%)    | 79 (9.4%)        |         |
| 2+                                         | 18 (2.7%)               | 2 (1.2%)      | 20 (2.4%)        |         |
| <b>Household Income</b>                    |                         |               |                  | 0.03    |
| < \$40,000                                 | 66 (9.8%)               | 24 (14.1%)    | 90 (10.7%)       |         |
| \$40,000 – \$49,999                        | 31 (4.6%)               | 10 (5.9%)     | 41 (4.9%)        |         |
| \$50,000 – \$59,999                        | 55 (8.2%)               | 8 (4.7%)      | 63 (7.5%)        |         |
| \$60,000 – \$74,999                        | 64 (9.5%)               | 13 (7.6%)     | 77 (9.1%)        |         |
| \$75,000 – \$99,999                        | 105 (15.6%)             | 34 (20.0%)    | 139 (16.5%)      |         |
| ≥ \$100,000                                | 261 (38.8%)             | 48 (28.2%)    | 309 (36.7%)      |         |
| Unknown                                    | 91 (13.5%)              | 33 (19.4%)    | 124 (14.7%)      |         |
| <b>Patients Region</b>                     |                         |               |                  | 0.10    |
| Midwest                                    | 47 (7.0%)               | 17 (10.0%)    | 64 (7.6%)        |         |
| Northeast                                  | 183 (27.2%)             | 32 (18.8%)    | 215 (25.5%)      |         |
| South                                      | 287 (42.6%)             | 82 (48.2%)    | 369 (43.8%)      |         |
| West                                       | 156 (23.2%)             | 39 (22.9%)    | 195 (23.1%)      |         |
| <b>Obesity</b>                             | 39 (5.8%)               | 13 (7.6%)     | 52 (6.2%)        | 0.37    |
| <b>Diabetes Mellitus</b>                   | 17 (2.5%)               | 7 (4.1%)      | 24 (2.8%)        | 0.26    |
| <b>Hypertension</b>                        | 17 (2.5%)               | 5 (2.9%)      | 22 (2.6%)        | 0.76    |
| <b>History of recurrent pregnancy loss</b> | 18 (2.7%)               | 5 (2.9%)      | 23 (2.7%)        | 0.85    |
| <b>History of Thyroid Disease</b>          | 40 (5.9%)               | 12 (7.1%)     | 52 (6.2%)        | 0.59    |

\*Chi-Square Test, T-Test for continuous variable (Age, TSH value)

**Supplementary Table I: Clinical Outcomes Associated with Levothyroxine Treatment Adherence**

| <b>Adverse Outcomes<sup>1</sup></b>         | <b>Adhered to<br/>Levothyroxine<br/>(N=673)</b> | <b>Not Treated<br/>(N=4562)</b> | <b>OR, 95% CI</b> | <b>P-Value<sup>4</sup></b> |
|---------------------------------------------|-------------------------------------------------|---------------------------------|-------------------|----------------------------|
| <b>Pregnancy Loss<sup>2</sup></b>           | 78 (11.6%)                                      | 614 (13.5%)                     | 0.69 (0.52,0.91)  | 0.01                       |
| <b>Preterm delivery</b>                     | 48 (7.1%)                                       | 236 (5.2%)                      | 1.61 (1.12,2.32)  | 0.01                       |
| <b>Preterm labor</b>                        | 91 (13.5%)                                      | 569 (12.5%)                     | 1.17 (0.89,1.52)  | 0.26                       |
| <b>Premature rupture of membranes</b>       | 37 (5.5%)                                       | 220 (4.8%)                      | 1.10 (0.73,1.65)  | 0.65                       |
| <b>Placental abruption</b>                  | 5 (0.7%)                                        | 36 (0.8%)                       | 1.49 (0.54,4.12)  | 0.45                       |
| <b>Gestational diabetes</b>                 | 70 (10.4%)                                      | 401 (8.8%)                      | 1.14 (0.84,1.54)  | 0.41                       |
| <b>Gestational hypertension<sup>3</sup></b> | 40 (5.9%)                                       | 221 (4.8%)                      | 1.24 (0.83,1.84)  | 0.29                       |
| <b>Preeclampsia<sup>3</sup></b>             | 35 (5.2%)                                       | 177 (3.9%)                      | 1.54 (1.01,2.35)  | 0.05                       |
| <b>Poor fetal growth</b>                    | 61 (9.1%)                                       | 397 (8.7%)                      | 1.09 (0.79,1.5)   | 0.60                       |
| <b>Tachycardia</b>                          | 12 (1.8%)                                       | 90 (2.0%)                       | 1.41 (0.73,2.73)  | 0.31                       |

<sup>1</sup>Adjusted for Age and TSH Value continuous variables, Race, Income, Charlson Index, hypertension, obesity and history of thyroid disease

<sup>2</sup>Adjusted for History of Pregnancy Loss in addition to other covariates

<sup>3</sup> Adjusted for Age and TSH Value continuous variables, Race, Income, Charlson Index, obesity and history of thyroid disease

<sup>4</sup>P-Value used is for adjusted outcomes

**Supplementary Table J: Clinical Outcomes Associated with Levothyroxine Treatment Adherence, Stratified by TSH Level**

| <b>Adverse Outcomes<sup>1</sup></b>         | <b>TSH Level 2.5 - 4.0<br/>(OR, 95% CI)<sup>4</sup></b> | <b>TSH Level 4.1 - 10.0<br/>(OR, 95% CI)<sup>4</sup></b> | <b>P-Value for<br/>Interaction</b> |
|---------------------------------------------|---------------------------------------------------------|----------------------------------------------------------|------------------------------------|
| <b>Pregnancy Loss<sup>2</sup></b>           | 1.01 (0.70, 1.44)                                       | 0.48 (0.32, 0.72)                                        | 0.01                               |
| <b>Preterm delivery</b>                     | 1.89 (1.20, 2.96)                                       | 1.42 (0.82, 2.44)                                        | 0.42                               |
| <b>Preterm labor</b>                        | 1.30 (0.92, 1.84)                                       | 1.02 (0.70, 1.48)                                        | 0.34                               |
| <b>Premature rupture of membranes</b>       | 1.29 (0.76, 2.19)                                       | 0.90 (0.52, 1.56)                                        | 0.36                               |
| <b>Placental abruption</b>                  | 1.73 (0.60, 4.99)                                       | 0.89 (0.08, 9.87)                                        | 0.62                               |
| <b>Gestational diabetes</b>                 | 1.23 (0.82, 1.84)                                       | 1.21 (0.79, 1.87)                                        | 0.97                               |
| <b>Gestational hypertension<sup>3</sup></b> | 1.76 (1.08, 2.86)                                       | 0.92 (0.53, 1.61)                                        | 0.09                               |
| <b>Preeclampsia<sup>3</sup></b>             | 1.78 (1.05, 3.02)                                       | 1.47 (0.78, 2.75)                                        | 0.64                               |
| <b>Poor fetal growth</b>                    | 0.98 (0.62, 1.55)                                       | 1.07 (0.70, 1.64)                                        | 0.80                               |
| <b>Tachycardia</b>                          | 1.27 (0.58, 2.80)                                       | 1.31 (0.41, 4.19)                                        | 0.96                               |

<sup>1</sup>Adjusted for age, race, income, Charlson Index, hypertension, obesity and history of thyroid disease

<sup>2</sup>Adjusted for history of pregnancy loss in addition to other covariates

<sup>3</sup> Adjusted for age, race, income, Charlson Index, obesity and history of thyroid disease

<sup>4</sup>Untreated women is the referent group
